# Supplementary material for: Interplay between humidity, temperature and electrical response of a conductivity sensor based on a La2LiNbO6 double perovskite
Source: Royal Society of Chemistry journal article supplement (doi:10.1039/c7ta09496e), 2018-01-01
Supplement: c7ta09496e1.pdf [file c7ta09496e1.pdf]

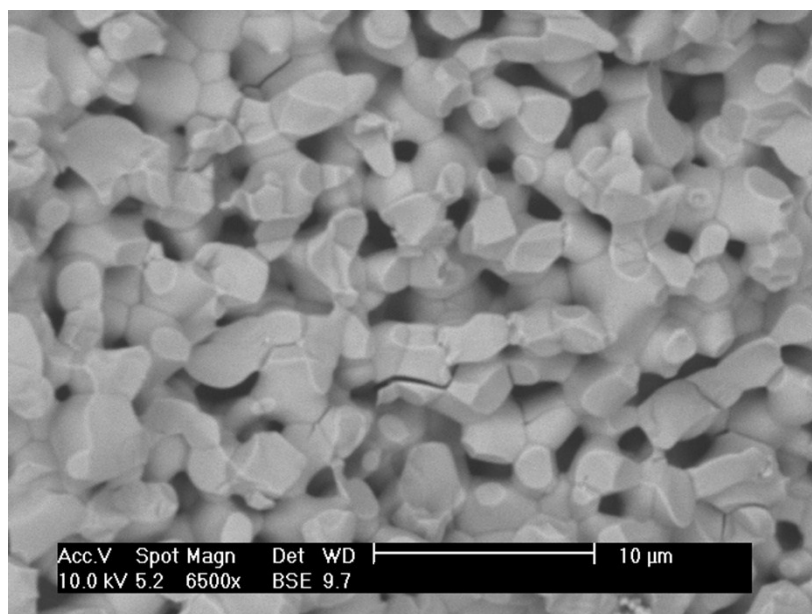

**Figure S1.** Scanning Electron Micrograph taken with backscattered electrons detector of a sample sintered at 1100 °C for 10 h.

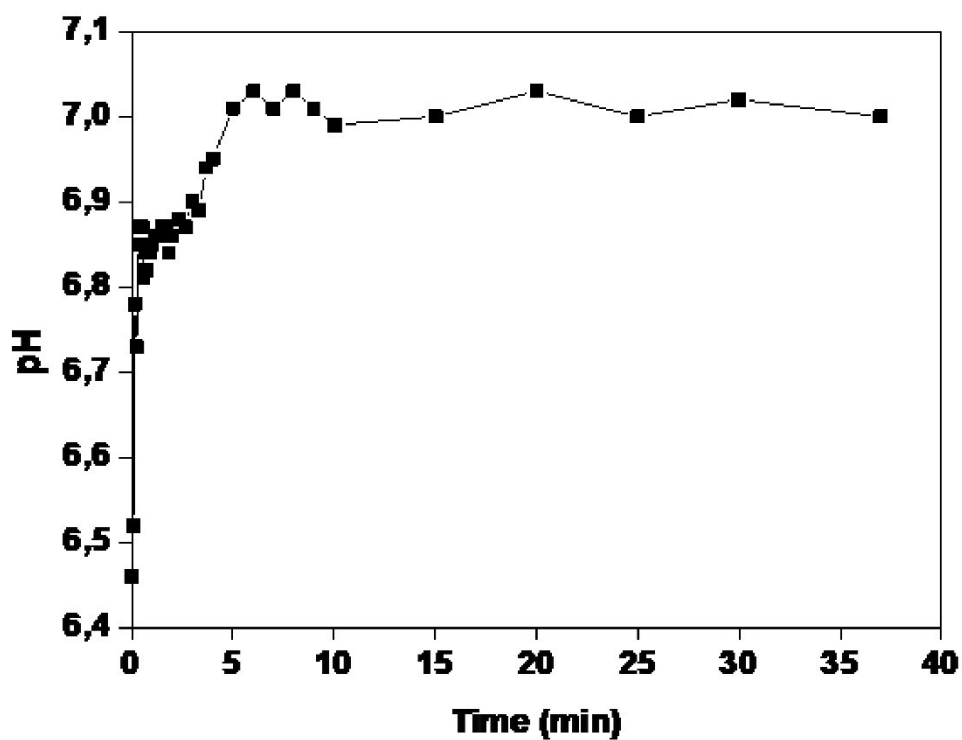

**Figure S2.** pH evolution at room temperature of suspension of 500 mg of  $\text{La}_2\text{LiNbO}_6$  in 50 ml of water.

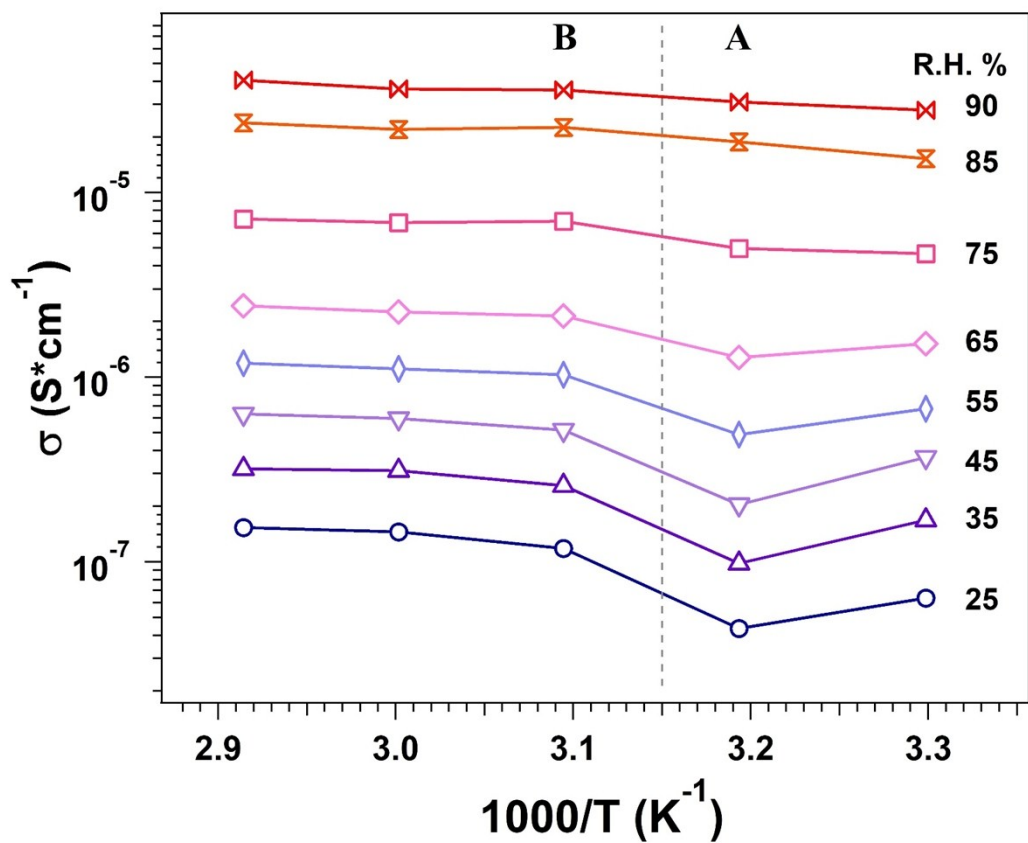

**Figure S3.** Dependence on  $1/T$  of the conductivity of  $\text{La}_2\text{LiNbO}_6$  sensor.  $\alpha$  point at  $T = 45^\circ\text{C}$  and  $\text{RH}\% = 62\%$  delimits the T and RH% regions where the sensor is useful for practical applications ( $T \geq 46^\circ\text{C}$ ,  $\text{RH}\% > 62\%$ ).

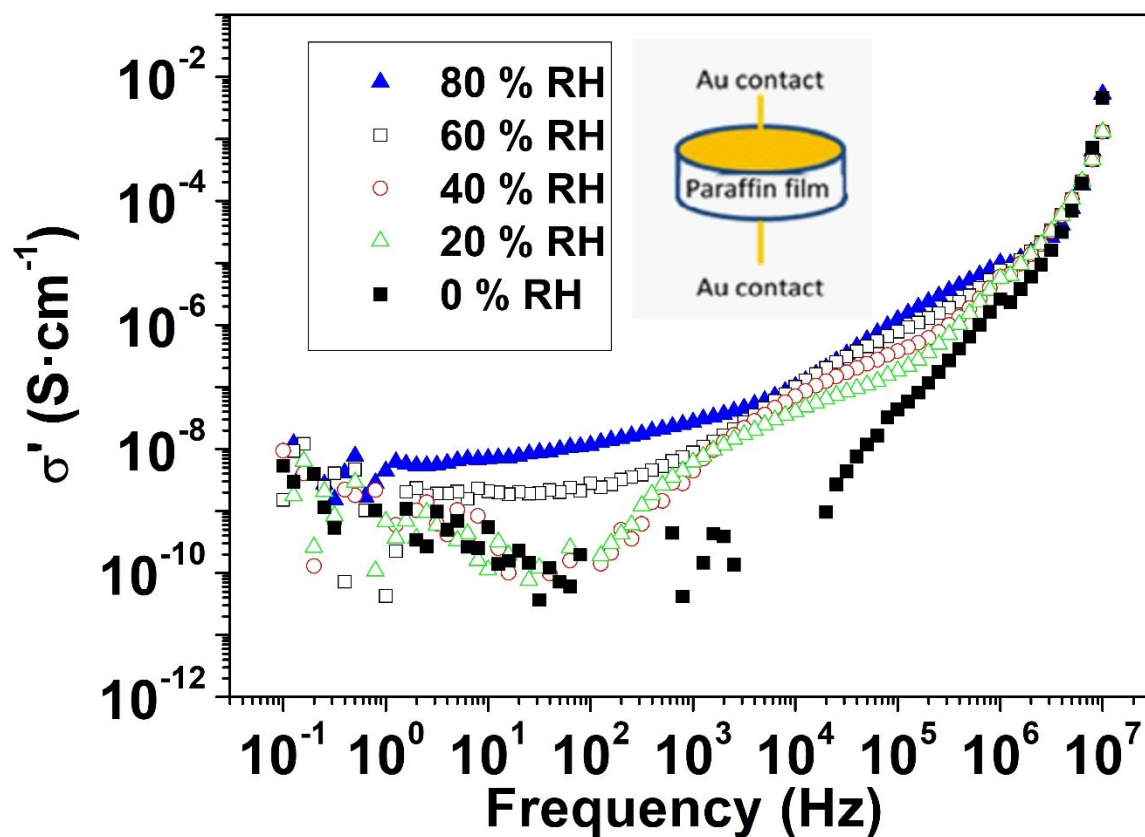

**Figure S4.** Dependence on frequency of real component of conductivity ( $\sigma'$ ) of sample (disk) with the lateral surfaces covered with a paraffin film. The test sample was prepared using a dry pellet of the sample inside a dry box. Tests were carried out at different RH%.

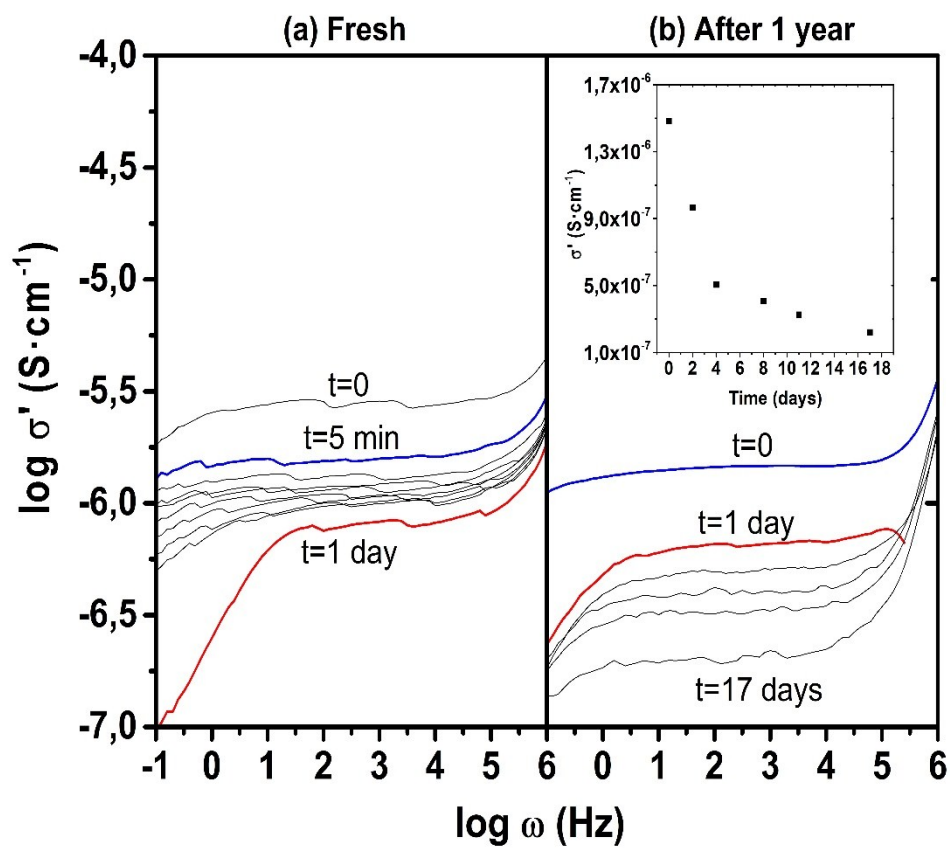

**Figure S5.** Electric response on time at 50 °C and 55 % RH of La<sub>2</sub>LiNbO<sub>6</sub> sample. (a) sensor freshly assembled and (b) after one year of operation. The inset shows the dependence of  $\sigma''$  measured at 1kHz on time after one year.

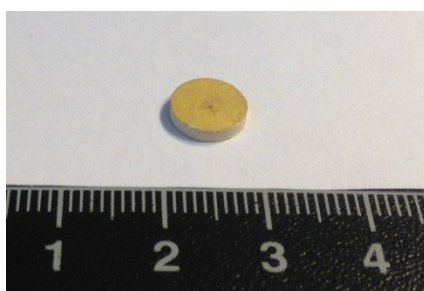

**Figure S6.** Shape and size of La<sub>2</sub>LiNbO<sub>6</sub> pellet used to study the electric response on RH%.
